# Supplementary material for: Archie's law – a reappraisal
Source: Copernicus journal article supplement (doi:10.5194/se-7-1157-2016), 2016-07-29
Supplement: Supplementary file 1 [file se-7-1157-2016-supplement.zip]

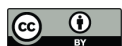

## *Supplement of*

## **Archie's law – a reappraisal**

**Paul W. J. Glover**

*Correspondence to:* Paul W. J. Glover ([p.w.j.glover@leeds.ac.uk](mailto:p.w.j.glover@leeds.ac.uk))

- [se-7-1157-2016-supplement-title-page.pdf](#)
- [SUPPLEMENTARY DATA3.xlsx](#)

The copyright of individual parts of the supplement might differ from the CC-BY 3.0 licence.
